# Supplementary material for: Anti-cariogenic Properties of Lactobacillus plantarum in the Utilization of Galacto-Oligosaccharide
Source: MDPI journal article supplement (doi:10.3390/nu15092017), 2023-04-22
Supplement: s1 [file s1]

**Table S1.** Primers used in RT-qPCR [14].

| <b>Genes</b> | <b>Primers</b> | <b>Sequence</b>           | <b>Amplicon Size</b> |
|--------------|----------------|---------------------------|----------------------|
| atpD         | Sm_atpD_F      | TGTTGATGGTCTGGGTGAAA      | 176                  |
|              | Sm_atpD_R      | TTTGACGGTCTCCGATAACC      |                      |
| eno          | Sm_eno_F       | CAGCGTCTTCAGTTCCATCA      | 194                  |
|              | Sm_eno_R       | TCACTCAGATGCTCCAATCG      |                      |
| lacG         | Sm_lacG_F      | ATTGGATGCGTGCTTTTGATGG    | 94                   |
|              | Sm_lacG_R      | CGACCGACACCCCTTAATCTGG    |                      |
| lacC         | Sm_lacC_F      | GCTGGAATTACATCGGCTCTTGC   | 157                  |
|              | Sm_lacC_R      | CCTCCGCTACCTCAATTGTGTTG   |                      |
| ACT1         | Ca_ACT1_F      | TGCTCCAGAAGAACACCCA       | 182                  |
|              | Ca_ACT1_R      | CACCTGAATCCAAAACAATACCAGT |                      |
| HWP1         | Ca_HWP1_F      | TGGTGCTATTACTATTCCGG      | 182                  |
|              | Ca_HWP1_R      | CAATAATAGCAGCACCGAAG      |                      |
| ECE1         | Ca_ECE1_F      | GCTGGTATCATTGCTGATAT      | 168                  |
|              | Ca_ECE1_R      | TTCGATGGATTGTTGAACAC      |                      |
| CHT2         | Ca_CHT2_F      | TTGGGATGCTTCTGGGGCTT      | 111                  |
|              | Ca_CHT2_R      | GCAGAAGAAGATGGGGCAACAC    |                      |
| ERG4         | Ca_ERG4_F      | TCAAATGTGCCAATGGTTCT      | 101                  |
|              | Ca_ERG4_R      | AGCCCAAGTCAATGTTTGAA      |                      |
| SOD3         | Ca_SOD3_F      | CAGTATGGGTCTGTTTCAAACCTTA | 211                  |
|              | Ca_SOD3_R      | GATATTGCAAGTAGTACGCATGTTC |                      |
| rpoB         | Lp14_rpoB_F    | CACCGTACCCGTAGAAGTTATGC   | 106                  |
|              | Lp14_rpoB_R    | GGAGACCTTGATCCAAGAACCA    |                      |
| plnA         | Lp14_plnA_F    | GTGGAAAGAGTAGTGCGTATTC    | 135                  |
|              | Lp14_plnA_R    | CGCCATCTATACGAAATATAACTTG |                      |
| plnD         | Lp14_plnD_F    | TGAGGACAAACAGACTGGAC      | 415                  |
|              | Lp14_plnD_R    | GCATCGGAAAAATTGCGGATAC    |                      |
| plnN         | Lp14_plnN_F    | ATTGCCGGGTTAGGTATCG       | 146                  |
|              | Lp14_plnN_R    | CCTAAACCATGCCATGCAC       |                      |
